# Supplementary material for: The use of plants as a “green factory” to produce high strength gluten-based materials
Source: Royal Society of Chemistry journal article supplement (doi:10.1039/c5gc03111g), 2016-01-01
Supplement: c5gc03111g1.pdf [file c5gc03111g1.pdf]

Table S1: Percentage of explanation (obtained through R-square from simple linear regression) of, genetics (G), nitrogen applications (N1-N4), temperature (T1, T2, grain maturation period (GMP) and G x GMP x E on percentage of unextracted polymeric proteins in total polymeric proteins (%UPP) in films.

| Factors                             | %UPP |
|-------------------------------------|------|
| <b>G (5+10, 2+12)</b>               | 5.6  |
| <b>N (N1, N2, N3, N4)</b>           | 6.1  |
| <b>Temperature (T1, T2)</b>         | 4.9  |
| <b>GMP</b>                          | 10.3 |
| <b>G x GMP x E (N, temperature)</b> | 43.7 |

Table S2: Percentage of explanation (obtained through R-square from simple linear regression) of, nitrogen applications (N1-N4), temperature (T1, T2) and E (N x temperature) on percentage of unextracted polymeric proteins in total polymeric proteins (%UPP) in films.

| Factors                     | WG-5+10 films | WG-2+12 films |
|-----------------------------|---------------|---------------|
| <b>N (N1, N2, N3, N4)</b>   | 16.9          | 28.1          |
| <b>Temperature (T1, T2)</b> | 34.0          | 41.4          |
| <b>E (N, temperature)</b>   | 40.2          | 42.5          |

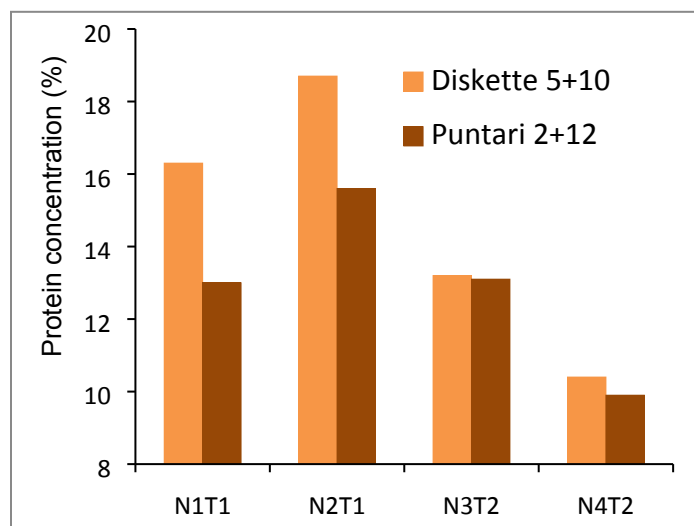

**Fig. S1:** Protein concentration in wheat seeds obtained from various genetics and environmental interactions.

### Protein Concentration

Protein concentration in wheat seeds from the samples of various G and E treatments was measured by near infrared reflectance spectroscopy (Infratec model 1241) using national calibration models based on ISO standard methodology (12099:2010).

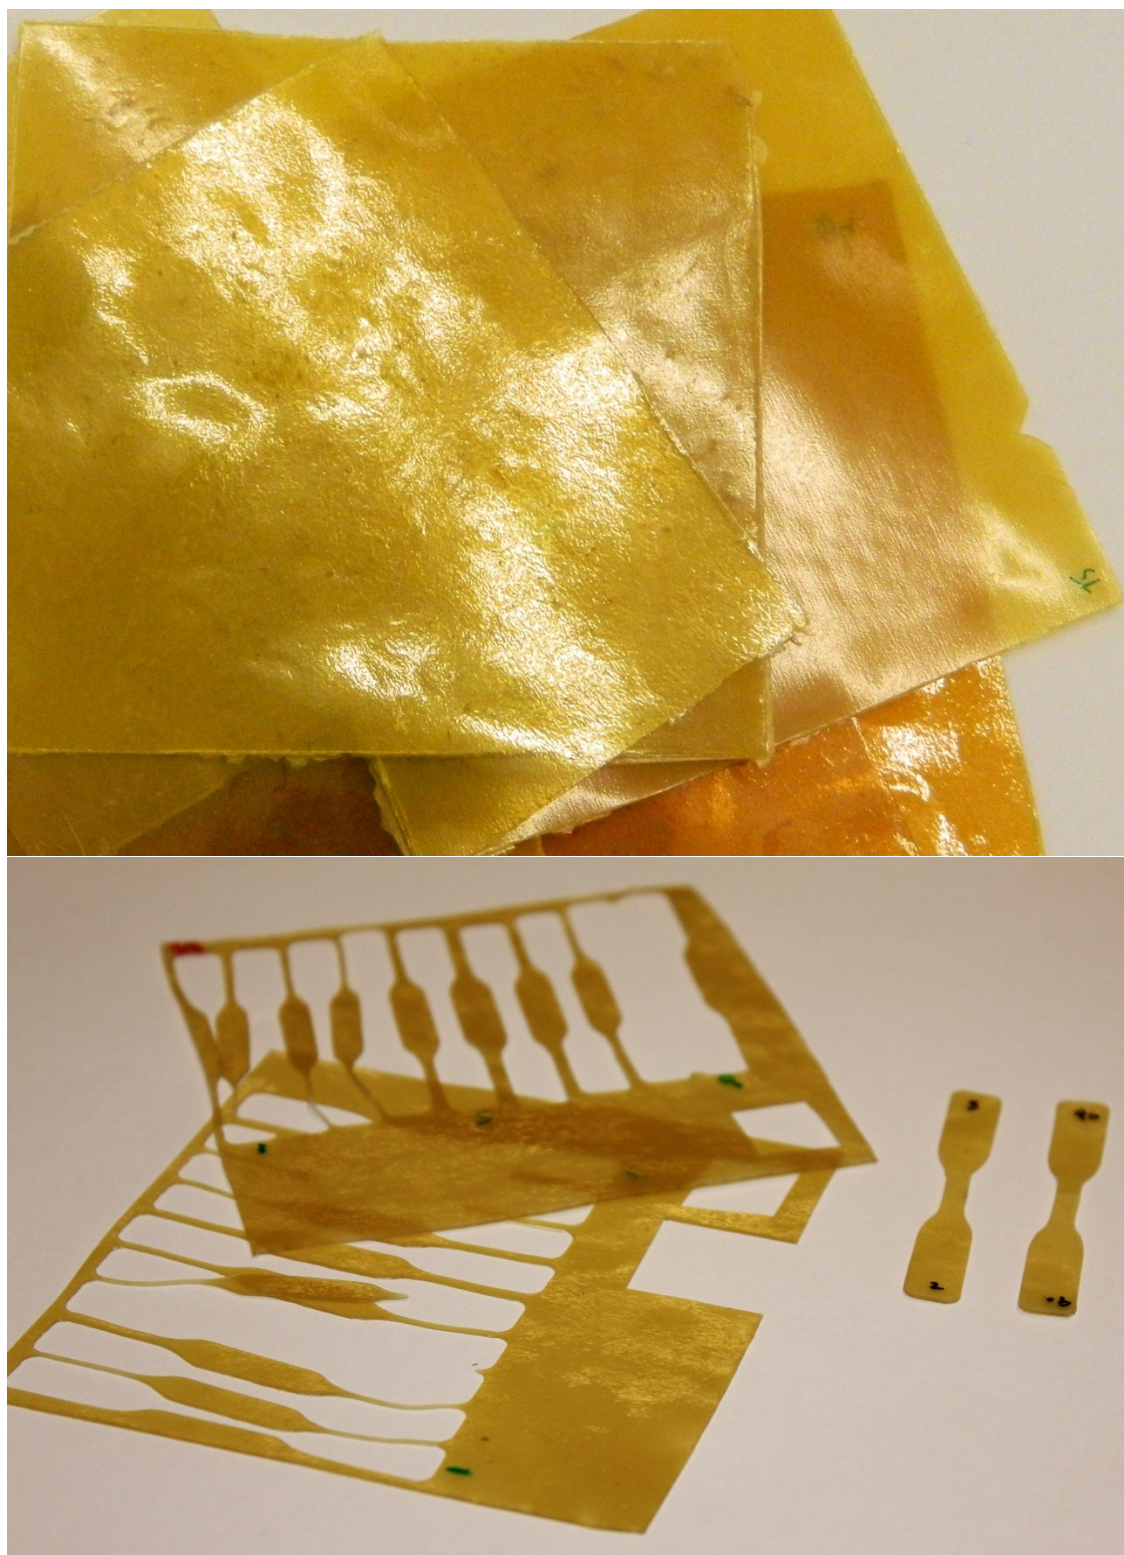

**Fig.S2:** Gluten films, with punched dumbbell shaped tensile bars.
